# Supplementary material for: Approximate Bayesian Computation of reduced-bias extreme risk measures from heavy-tailed distributions
Source: Research Square preprint supplement (doi:10.21203/rs.3.rs-7773261/v1), 2025-10-23
Supplement: Supplementary file 1 [file 67bf4547869fdd860ad3df39.pdf]

# Supplementary material for 'Approximate Bayesian Computation of reduced-bias extreme risk measures from heavy-tailed distributions'

Section [A](#) and Section [B](#) provide additional illustrations and numerical results associated with the experiments on simulated data (Section [4](#) of the main paper). The proofs of the theoretical results are given in Section [C](#).

## A Additional figures

The behavior of  $k \mapsto \text{Bias}_k(\hat{U}(1000))$  and  $k \mapsto \text{RMSE}_k(\hat{U}(1000))$  associated with the five estimators described in Section [4.2](#) is depicted on the first two rows of Figure [A1](#) (RPD and Burr distributions with  $\gamma = -\rho = 1/2$ ) and Figure [A2](#) (Fisher and GPD distributions with  $\gamma = -\rho = 1/2$ ). The third row displays the ABC estimator as a function of  $k \in \{2, \dots, n - 1 = 499\}$  and the associated 90% credible interval computed on a single replication.

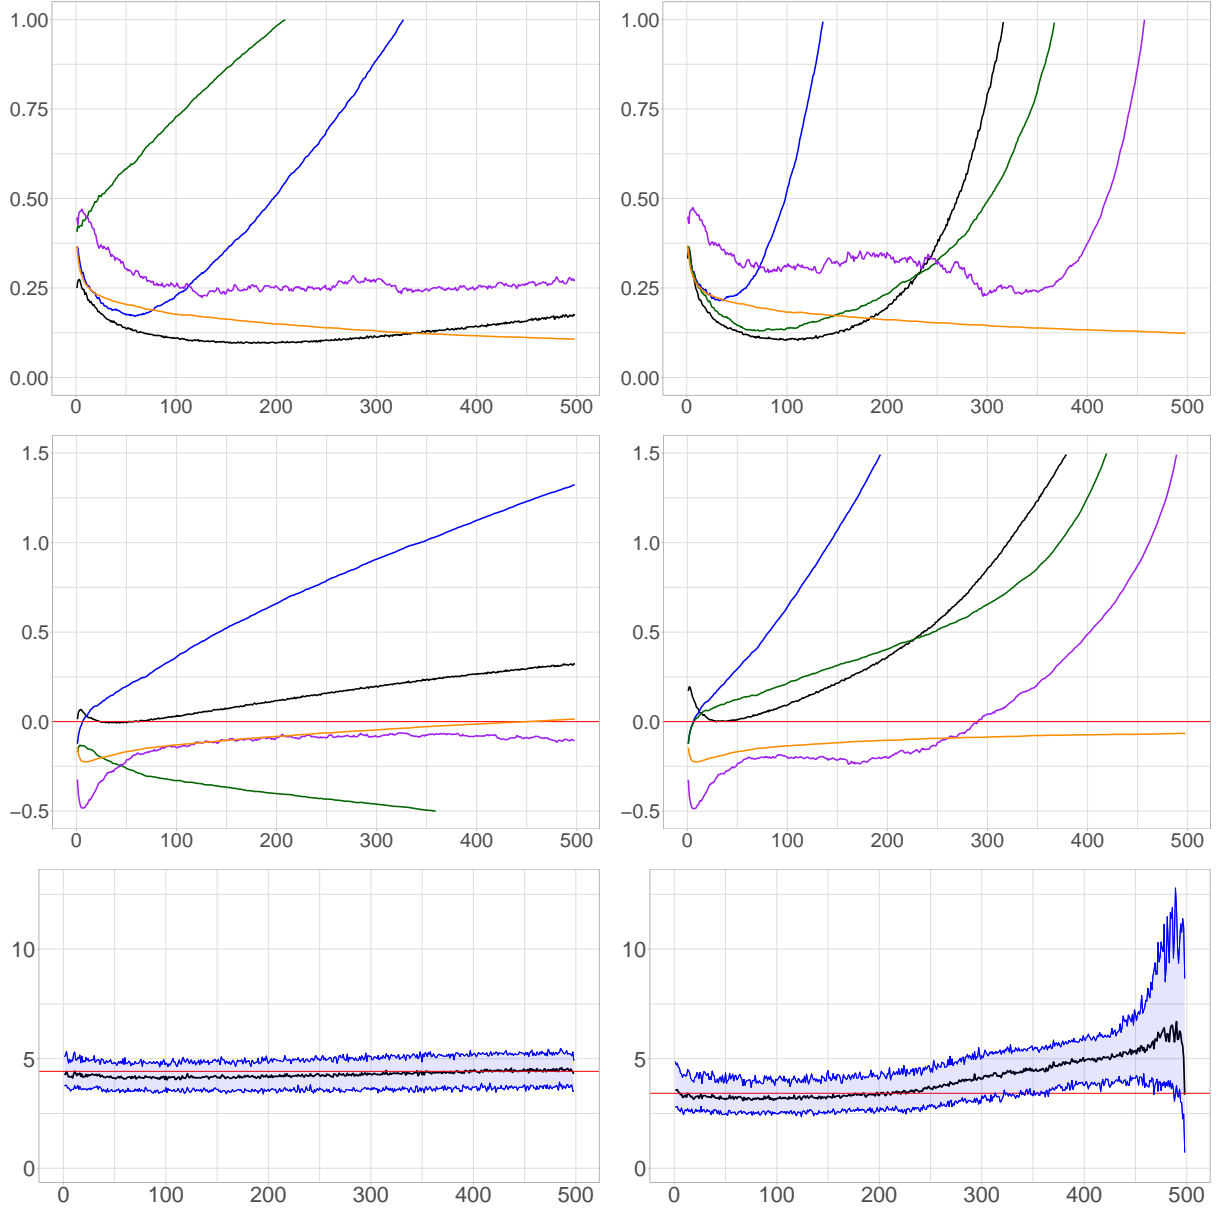

**Fig. A1:** Illustration on simulated data sets of size  $n = 500$  from a RPD (left panel) and a Burr distribution (right panel) with  $\gamma = -\rho = 1/2$  in both cases. Top:  $k \in \{2, \dots, n-1\} \mapsto \text{RMSE}_k(\hat{U}(1/p_n = 1000))$  and center:  $k \in \{2, \dots, n-1\} \mapsto \text{Bias}_k(\hat{U}(1/p_n = 1000))$  computed on  $N = 500$  replications associated with Weissman (blue), ABC (black), CW (green), PWM (purple) and GPD (orange) estimators. Bottom (in log scale): 90% credible intervals (blue) associated with the ABC estimator (black) computed on one replication. The theoretical extreme quantile  $U(1/p_n = 1000)$  is depicted by a red horizontal line.

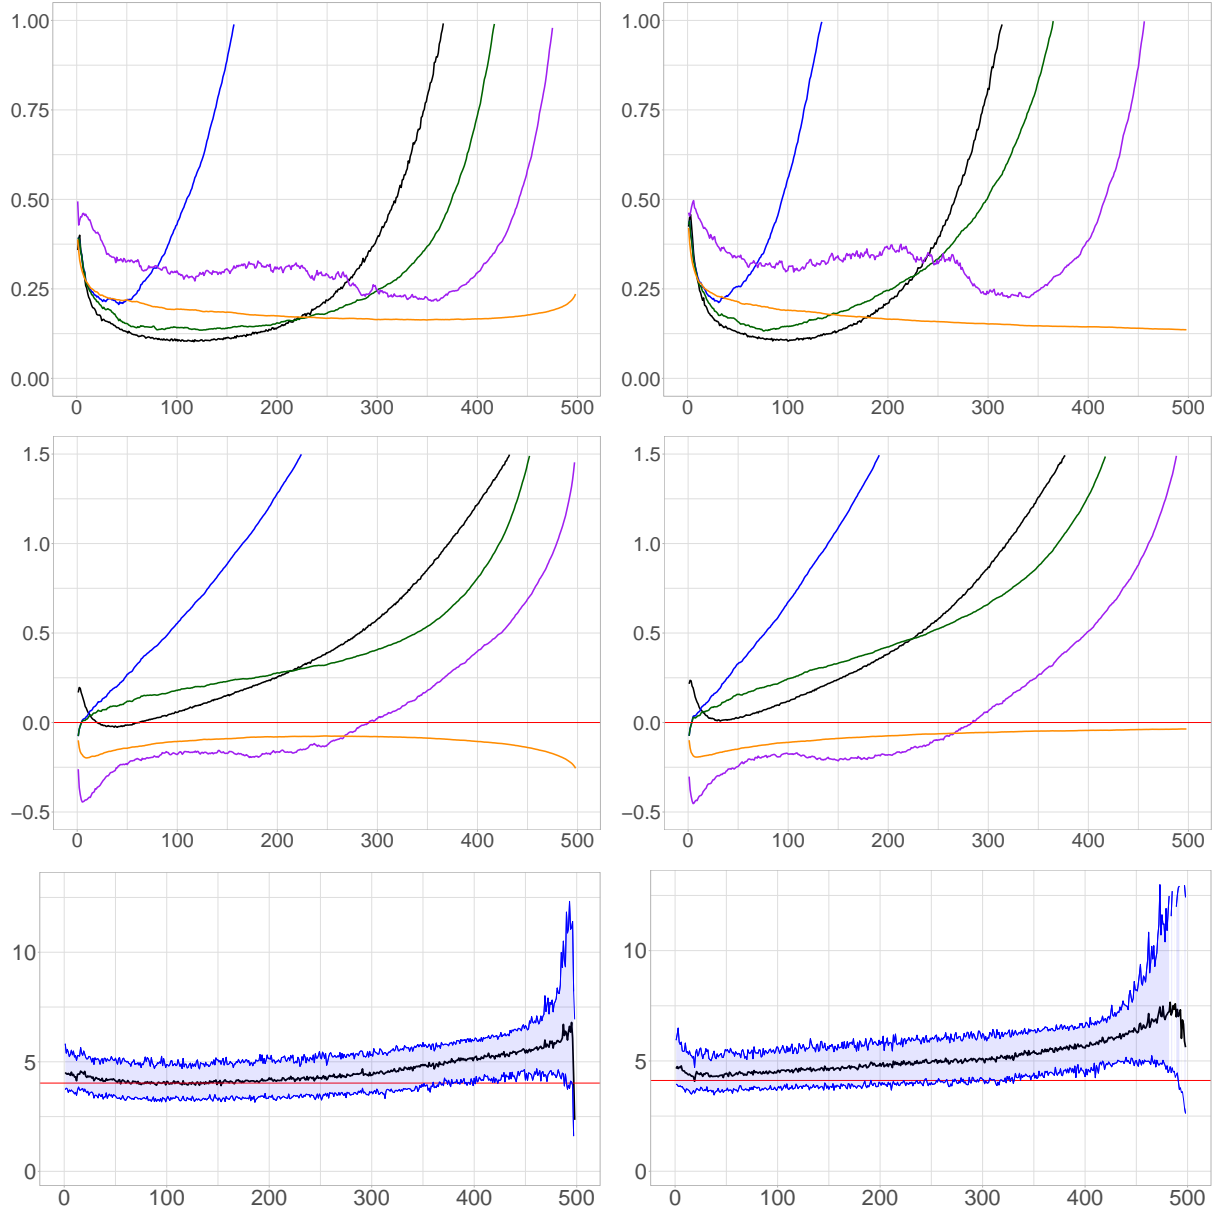

**Fig. A2:** Illustration on simulated data sets of size  $n = 500$  from a Fisher distribution (left panel) and a GPD (right panel) with  $\gamma = -\rho = 1/2$  in both cases. Top:  $k \in \{2, \dots, n-1\} \mapsto \text{RMSE}_k(\hat{U}(1/p_n = 1000))$  and center:  $k \in \{2, \dots, n-1\} \mapsto \text{Bias}_k(\hat{U}(1/p_n = 1000))$  computed on  $N = 500$  replications associated with Weissman (blue), ABC (black), CW (green), PWM (purple) and GPD (orange) estimators. Bottom (in log scale): 90% credible intervals (blue) associated with the ABC estimator (black) computed on one replication. The theoretical extreme quantile  $U(1/p_n = 1000)$  is depicted by a red horizontal line.

## B Additional tables

The  $M_1$ RMSEs are provided in Table B1 for the RPD, in Table B2 for the Burr distribution and in Table B3 for Fréchet, Fisher, GPD, Inverse Gamma, and Student  $t$  distributions.

**Table B1:**  $M_1$ RMSE associated with five estimators of  $\log U(1/p_n = 1000)$  computed on  $N = 500$  replications of a data set of size  $n = 500$  from a RPD. The best result is emphasized in bold.  $M_1$ RMSEs larger than 1 are not reported.

| RPD            | Weissman      | ABC           | CW     | PWM    | GPD           |
|----------------|---------------|---------------|--------|--------|---------------|
| $\gamma = 1/8$ |               |               |        |        |               |
| $\rho = -1/8$  | 0.0175        | <b>0.0106</b> | 0.0475 | 0.0202 | 0.0176        |
| $\rho = -1/4$  | 0.0165        | <b>0.0092</b> | 0.0385 | 0.0198 | 0.0132        |
| $\rho = -1/2$  | 0.0107        | <b>0.0059</b> | 0.0254 | 0.0140 | 0.0113        |
| $\rho = -1$    | 0.0060        | <b>0.0037</b> | 0.0111 | 0.0115 | 0.0138        |
| $\rho = -2$    | <b>0.0035</b> | 0.0042        | 0.0065 | 0.0073 | 0.0129        |
| $\gamma = 1/4$ |               |               |        |        |               |
| $\rho = -1/8$  | 0.0700        | <b>0.0423</b> | 0.1901 | 0.0810 | 0.0572        |
| $\rho = -1/4$  | 0.0638        | <b>0.0349</b> | 0.1359 | 0.0740 | 0.0425        |
| $\rho = -1/2$  | 0.0427        | <b>0.0237</b> | 0.1016 | 0.0558 | 0.0303        |
| $\rho = -1$    | 0.0240        | <b>0.0150</b> | 0.0445 | 0.0459 | 0.0454        |
| $\rho = -2$    | <b>0.0139</b> | 0.0168        | 0.0261 | 0.0293 | 0.0443        |
| $\gamma = 1/2$ |               |               |        |        |               |
| $\rho = -1/8$  | 0.2801        | <b>0.1691</b> | 0.7603 | 0.3239 | 0.2076        |
| $\rho = -1/4$  | 0.2551        | 0.1397        | 0.5435 | 0.2961 | <b>0.1203</b> |
| $\rho = -1/2$  | 0.1707        | <b>0.0950</b> | 0.4065 | 0.2234 | 0.1071        |
| $\rho = -1$    | 0.0960        | <b>0.0598</b> | 0.1779 | 0.1835 | 0.1301        |
| $\rho = -2$    | <b>0.0555</b> | 0.0671        | 0.1045 | 0.1171 | 0.1599        |
| $\gamma = 1$   |               |               |        |        |               |
| $\rho = -1/8$  | -             | <b>0.6764</b> | -      | -      | -             |
| $\rho = -1/4$  | -             | <b>0.5588</b> | -      | -      | -             |
| $\rho = -1/2$  | 0.6830        | <b>0.3799</b> | -      | 0.8935 | -             |
| $\rho = -1$    | 0.3840        | <b>0.2393</b> | 0.7117 | 0.7340 | 0.8531        |
| $\rho = -2$    | <b>0.2219</b> | 0.2685        | 0.4179 | 0.4683 | 0.8102        |

**Table B2:**  $M_1$ RMSE associated with five estimators of  $\log U(1/p_n = 1000)$  computed on  $N = 500$  replications of a data set of size  $n = 500$  from a Burr distribution. The best result is emphasized in bold.  $M_1$ RMSEs larger than 1 are not reported.

| Burr           | Weissman | ABC           | CW     | PWM    | GPD           |
|----------------|----------|---------------|--------|--------|---------------|
| $\gamma = 1/8$ |          |               |        |        |               |
| $\rho = -1/8$  | 0.0593   | 0.0563        | 0.0585 | 0.0775 | <b>0.0264</b> |
| $\rho = -1/4$  | 0.0268   | <b>0.0182</b> | 0.0249 | 0.0321 | 0.0246        |
| $\rho = -1/2$  | 0.0134   | <b>0.0065</b> | 0.0081 | 0.0142 | 0.0173        |
| $\rho = -1$    | 0.0062   | <b>0.0029</b> | 0.0049 | 0.0056 | 0.0152        |
| $\rho = -2$    | 0.0035   | <b>0.0027</b> | 0.0055 | 0.0032 | 0.0132        |
| $\gamma = 1/4$ |          |               |        |        |               |
| $\rho = -1/8$  | 0.2373   | 0.2251        | 0.2339 | 0.3101 | <b>0.0961</b> |
| $\rho = -1/4$  | 0.1071   | 0.0727        | 0.0995 | 0.1284 | <b>0.0427</b> |
| $\rho = -1/2$  | 0.0537   | <b>0.0259</b> | 0.0324 | 0.0568 | 0.0566        |
| $\rho = -1$    | 0.0249   | <b>0.0115</b> | 0.0194 | 0.0225 | 0.0520        |
| $\rho = -2$    | 0.0146   | <b>0.0103</b> | 0.0198 | 0.0128 | 0.0456        |
| $\gamma = 1/2$ |          |               |        |        |               |
| $\rho = -1/8$  | 0.9493   | 0.9005        | 0.9355 | -      | <b>0.8022</b> |
| $\rho = -1/4$  | 0.4286   | 0.2908        | 0.3978 | 0.5136 | <b>0.0626</b> |
| $\rho = -1/2$  | 0.2147   | <b>0.1034</b> | 0.1297 | 0.2272 | 0.1237        |
| $\rho = -1$    | 0.0994   | <b>0.0460</b> | 0.0778 | 0.0900 | 0.1756        |
| $\rho = -2$    | 0.0556   | <b>0.0431</b> | 0.0883 | 0.0513 | 0.1632        |
| $\gamma = 1$   |          |               |        |        |               |
| $\rho = -1/8$  | -        | -             | -      | -      | -             |
| $\rho = -1/4$  | -        | -             | -      | -      | -             |
| $\rho = -1/2$  | 0.8559   | <b>0.4137</b> | 0.5190 | 0.9090 | -             |
| $\rho = -1$    | 0.3978   | <b>0.1841</b> | 0.3112 | 0.3602 | 0.8302        |
| $\rho = -2$    | 0.2263   | <b>0.1723</b> | 0.3522 | 0.2052 | 0.8257        |

**Table B3:**  $M_1$ RMSE associated with five estimators of  $\log U(1/p_n = 1000)$  computed on  $N = 500$  replications of data sets of size  $n = 500$  from five heavy-tailed distributions. The best result is emphasized in bold.

|                                    | Weissman | ABC           | CW            | PWM    | GPD           |
|------------------------------------|----------|---------------|---------------|--------|---------------|
| Fréchet ( $\rho = -1$ )            |          |               |               |        |               |
| $\gamma = 1/8$                     | 0.0047   | <b>0.0031</b> | 0.0047        | 0.0042 | 0.0135        |
| $\gamma = 1/4$                     | 0.0189   | <b>0.0122</b> | 0.0186        | 0.0169 | 0.0460        |
| $\gamma = 1/2$                     | 0.0759   | <b>0.0488</b> | 0.0745        | 0.0679 | 0.1624        |
| $\gamma = 1$                       | 0.3035   | <b>0.1953</b> | 0.2981        | 0.2716 | 0.8276        |
| Fisher ( $\rho = -\gamma$ )        |          |               |               |        |               |
| $\gamma = 1/8$                     | 0.0495   | 0.0412        | 0.0490        | 0.0683 | <b>0.0329</b> |
| $\gamma = 1/4$                     | 0.0860   | 0.0562        | 0.0766        | 0.1236 | <b>0.0555</b> |
| $\gamma = 1/2$                     | 0.2062   | <b>0.1022</b> | 0.1345        | 0.2158 | 0.1632        |
| $\gamma = 1$                       | 0.4578   | <b>0.2051</b> | 0.3587        | 0.3849 | 0.8800        |
| GPD ( $\rho = -\gamma$ )           |          |               |               |        |               |
| $\gamma = 1/8$                     | 0.0651   | 0.0551        | 0.0612        | 0.0785 | <b>0.0253</b> |
| $\gamma = 1/4$                     | 0.1088   | 0.0729        | 0.0977        | 0.1362 | <b>0.0441</b> |
| $\gamma = 1/2$                     | 0.2118   | <b>0.1042</b> | 0.1322        | 0.2253 | 0.1357        |
| $\gamma = 1$                       | 0.4030   | <b>0.1823</b> | 0.3030        | 0.3492 | 0.7971        |
| Inverse Gamma ( $\rho = -\gamma$ ) |          |               |               |        |               |
| $\gamma = 1/8$                     | 0.0256   | <b>0.0146</b> | 0.0234        | 0.0305 | 0.0260        |
| $\gamma = 1/4$                     | 0.0552   | <b>0.0272</b> | 0.0444        | 0.0579 | 0.0529        |
| $\gamma = 1/2$                     | 0.1268   | <b>0.0605</b> | 0.0843        | 0.1217 | 0.1755        |
| $\gamma = 1$                       | 0.3082   | <b>0.1789</b> | 0.2739        | 0.2529 | 0.81.98       |
| Student $t$ ( $\rho = -2\gamma$ )  |          |               |               |        |               |
| $\gamma = 1/8$                     | 0.0303   | <b>0.0263</b> | 0.0290        | 0.0427 | 0.0272        |
| $\gamma = 1/4$                     | 0.0572   | <b>0.0343</b> | 0.0477        | 0.0819 | 0.0541        |
| $\gamma = 1/2$                     | 0.1406   | 0.0619        | <b>0.0501</b> | 0.1170 | 0.1601        |
| $\gamma = 1$                       | 0.2721   | <b>0.1579</b> | 0.4192        | 0.2192 | 0.7659        |

## C Proofs

### **Proof of Proposition 1.**

Let us introduce  $\varphi(x) = \log U(\exp x)$  for all  $x \geq 0$ . Replacing in (8) yields the equation

$$\frac{1}{A(t)}(\varphi(\log t + \log y) - \varphi(\log t) - \gamma \log y) = K_\rho(y),$$

for all  $t \geq 1$  and  $y > 0$ , or equivalently, letting  $s = \log t$  and  $x = \log y$ ,

$$\frac{1}{A(\exp s)} \left( \frac{\varphi(s+x) - \varphi(s)}{x} - \gamma \right) = \frac{K_\rho(\exp x)}{x},$$

for all  $x \neq 0$  and  $s \geq 0$ . Letting  $x \rightarrow 0$  and remarking that  $K_\rho(\exp x)/x \rightarrow \rho$  yield

$$\varphi'(s) = \gamma + \rho A(\exp s) = \gamma(1 + \beta \exp(\rho s)),$$

in view of (6). Integrating, it follows that, for all  $s \geq 0$ ,

$$\varphi(s) = \varphi(0) + \gamma(s + \beta K_\rho(\exp s)),$$

leading to

$$U(x) = U(1)x^\gamma \exp(\beta\gamma K_\rho(x)),$$

for all  $x \geq 1$ . Conversely, it is easily checked that the above  $U$  function is a solution of (8). Finally, the condition  $\beta \geq -1$  is required to ensure that  $U$  is increasing. ■

### **Proof of Proposition 2.**

(i) The tail quantile function of  $Y$  is given for all  $y \geq 1$  by

$$U_\alpha(y) = U(y/\alpha)/U(1/\alpha) \tag{23}$$

so that (5) can be rewritten with  $t = 1/\alpha$  as

$$\lim_{\alpha \rightarrow 0} \frac{1}{A(1/\alpha)} (\log U_\alpha(y) - \gamma \log(y)) = K_\rho(y),$$

or equivalently,

$$\lim_{\alpha \rightarrow 0} \frac{1}{A(1/\alpha)} (\log U_\alpha(y) - \gamma \log(y) - A(1/\alpha)K_\rho(y)) = 0.$$

Taking account of (6), it follows

$$\lim_{\alpha \rightarrow 0} \alpha^\rho (\log U_\alpha(y) - \gamma \log(y) - \beta\gamma\alpha^{-\rho}K_\rho(y)) = 0,$$

leading to

$$\lim_{\alpha \rightarrow 0} \alpha^\rho (\log U_\alpha(y) - \log U_{\text{RPD}}(y \mid \gamma, \rho, \beta\alpha^{-\rho})) = 0,$$

if  $U_{\text{RPD}}(1) = 1$ . Taking the exponential concludes the proof.

(ii) The result is a consequence of (23) and of the identity

$$\frac{U_{\text{RPD}}(y/\alpha \mid \gamma, \rho, \beta)}{U_{\text{RPD}}(1/\alpha \mid \gamma, \rho, \beta)} = (1/\alpha)^\gamma \exp\left(\frac{\beta\gamma}{\rho}\alpha^{-\rho}(y^\rho - 1)\right) = U_{\text{RPD}}(y \mid \gamma, \rho, \beta\alpha^{-\rho})$$

that holds for all  $y \geq 1$ . ■

**Proof of Proposition 3.**

The probability weighted moment of order  $a > -1$  is given by

$$m_Y(a) = (a+1)^2 \mathbb{E}((\log Y)(\bar{F}_{\text{RPD}}(Y))^a) = (a+1)^2 \int_{U_{\text{RPD}}(1)}^{+\infty} \log(x)(\bar{F}_{\text{RPD}}(x))^a f_{\text{RPD}}(x) dx,$$

where  $\bar{F}_{\text{RPD}}$  and  $f_{\text{RPD}}$  denote respectively the survival function and the density function associated with the tail quantile function  $U_{\text{RPD}}$  given in Definition 1. The change of variable  $y \mapsto x = U_{\text{RPD}}(y)$  yields

$$\begin{aligned} m_Y(a) &= (a+1)^2 \int_1^{+\infty} \log(U_{\text{RPD}}(y)) y^{-a-2} dy, \\ &= (a+1)^2 \int_1^{+\infty} \log(U_{\text{RPD}}(1) y^\gamma \exp(\beta\gamma K_\rho(y))) y^{-a-2} dy, \\ &= (a+1)^2 \log(U_{\text{RPD}}(1)) \int_1^{+\infty} y^{-a-2} dy + (a+1)^2 \gamma \int_1^{+\infty} \log(y) y^{-a-2} dy \\ &\quad + (a+1)^2 \beta\gamma \int_1^{+\infty} K_\rho(y) y^{-a-2} dy. \end{aligned}$$

The first term vanishes given that  $U_{\text{RPD}}(1) = 1$ . Integrating by parts the second term concludes the proof.  $\blacksquare$

**Proof of Proposition 4.**

Suppose  $U_{\text{RPD}}(1) = 1$ ,  $a\gamma < 1$  and introduce  $c = -a\beta\gamma/\rho$ . Then, a direct calculation yields

$$\begin{aligned} \text{CTM}_Y(a, \alpha) &= \frac{1}{\alpha} \int_0^\alpha U_{\text{RPD}}^a(1/v \mid \gamma, \rho, \beta) dv \\ &= \frac{1}{\alpha} \int_0^\alpha v^{-a\gamma} \exp(a\beta\gamma K_\rho(1/v)) dv \\ &= \frac{\exp(c)}{\alpha} \int_0^\alpha v^{-a\gamma} \exp(-cv^{-\rho}) dv \\ &= \exp(c) \alpha^{-a\gamma} \int_0^1 u^{-a\gamma} \exp(-c\alpha^{-\rho} u^{-\rho}) du, \end{aligned}$$

which is the desired result. Finally, note that, if  $\beta > 0$ , then  $c > 0$  too and the CTM can be computed as

$$\text{CTM}_Y(a, \alpha) = -\frac{\exp(c)}{\alpha\rho} c^{\frac{1-a\gamma}{\rho}} \Gamma_\ell\left(\frac{a\gamma-1}{\rho}, c\alpha^{-\rho}\right),$$

where  $\Gamma_\ell(\cdot, \cdot)$  is the incomplete lower gamma function.  $\blacksquare$

**Proof of Lemma 1.**

The result is a straightforward consequence of (23) in the proof of Proposition 2: Letting  $\alpha = k/n$  and  $y = d_n = k/(np_n)$  yields  $U_{k/n}(d_n) = U(1/p_n)/U(n/k)$  and the result is proved.  $\blacksquare$



**Proof of Theorem 5.**

Let  $d_n = k/(np_n)$  be the extrapolation factor. The following expansion holds:

$$\begin{aligned}\log \hat{U}(1/p_n) - \log U(1/p_n) &= (\log \hat{U}(1/p_n) - \overline{\log U}(1/p_n)) + (\overline{\log U}(1/p_n) - \log U(1/p_n)) \\ &= A_{1,n} + A_{2,n} + A_{3,n} + B_n, \\ \text{with } A_{1,n} &= \log X_{n-k,n} - \log U(n/k), \\ A_{2,n} &= (\hat{\gamma} - \gamma) \log(d_n), \\ A_{3,n} &= \hat{\gamma} \hat{\beta}_n K_{\hat{\rho}}(d_n) - \gamma \beta_n K_{\rho}(d_n), \\ B_n &= \log U_{\text{RPD}}(d_n \mid \gamma, \rho, \beta(n/k)^\rho) - \log U_{k/n}(d_n).\end{aligned}$$

Each term is considered separately. First, (de Haan and Ferreira, 2006, Theorem 2.4.1) yields

$$\frac{\sqrt{k_n}}{\log(d_n)} A_{1,n} = O_P(1/\log(d_n)), \quad (24)$$

since  $\sqrt{k}A(n/k) \rightarrow \lambda$  as  $n \rightarrow \infty$ . Second, letting  $\xi_n := \sqrt{k}(\hat{\gamma} - \gamma)$ , one has

$$\frac{\sqrt{k_n}}{\log(d_n)} A_{2,n} = \xi_n. \quad (25)$$

Third, let us rewrite  $A_{3,n}$  as

$$A_{3,n} = \beta_n \left( \hat{\gamma} \frac{\hat{\beta}_n}{\beta_n} K_{\hat{\rho}}(d_n) - \gamma K_{\rho}(d_n) \right) = \gamma \beta(n/k)^\rho (K_{\hat{\rho}}(d_n) O_P(1) - K_{\rho}(d_n)),$$

since  $\hat{\gamma} \xrightarrow{\mathbb{P}} \gamma$  and  $\hat{\beta}_n/\beta_n = O_P(1)$  by assumption. Remark that  $K_{\rho}(d_n) \rightarrow -1/\rho$  as  $n \rightarrow \infty$  while  $|K_{\hat{\rho}}(d_n)| \leq -2/\hat{\rho} \leq -2/\rho^\dagger$  almost surely. As a consequence,

$$\frac{\sqrt{k_n}}{\log(d_n)} A_{3,n} = O_P(1/\log(d_n)), \quad (26)$$

under the assumption  $\sqrt{k}A(n/k) \rightarrow \lambda$  as  $n \rightarrow \infty$ . Finally,  $B_n$  is a non-random term controlled with (de Haan and Ferreira, 2006, Eq. (3.2.7)): For all  $\varepsilon > 0$ , there exists  $t_0$  such that for  $t \geq t_0$  and  $y \geq 1$ ,

$$\left| \frac{1}{A(t)} (\log U(ty) - \log U(t) - \gamma \log(y)) - K_{\rho}(y) \right| \leq \varepsilon y^{\rho+\varepsilon}.$$

Taking account of (6) and considering  $y = d_n \rightarrow \infty$  and  $t = n/k \rightarrow \infty$ , it follows

$$|\log U(1/p_n) - \log U(n/k) - \gamma \log(d_n) - \gamma \beta(n/k)^\rho K_{\rho}(d_n)| \leq \varepsilon d_n^{\rho+\varepsilon} |A(n/k)|,$$

or equivalently, in view of Definition 1 and (23) in the proof of Proposition 2,  $|B_n| \leq \varepsilon d_n^{\rho+\varepsilon} |A(n/k)|$ , so that

$$\frac{\sqrt{k_n}}{\log(d_n)} |B_n| \leq \varepsilon |\lambda| \frac{d_n^{\rho+\varepsilon}}{\log(d_n)} (1 + o(1)), \quad (27)$$

under the assumption  $\sqrt{k}A(n/k) \rightarrow \lambda$  as  $n \rightarrow \infty$ . Combining (24)–(27), it follows that

$$\frac{\sqrt{k}}{\log(d_n)} (\log \hat{U}(1/p_n) - \log U(1/p_n)) = \xi_n + O_P\left(\frac{1}{\log(d_n)}\right) + O\left(\frac{d_n^{\rho+\varepsilon}}{\log(d_n)}\right),$$

Choosing  $\varepsilon < -\rho$  concludes the proof. ■

***Proof of Lemma 2.***

Recall that

$$\text{CTM}_X(a, p_n) = \frac{1}{p_n} \int_0^{p_n} U^a(1/v) dv,$$

with  $U(1/v) = U(n/k)U_{k/n}(k/(nv))$  from (23) in the proof of Proposition 2. Replacing, one obtains

$$\text{CTM}_X(a, p_n) = \frac{1}{p_n} U^a(n/k) \int_0^{p_n} U_{k/n}^a(k/(nv)) dv = d_n U^a(n/k) \int_0^{1/d_n} U_{k/n}^a(1/u) du,$$

with the change of variable  $u = nv/k$ . Remarking that

$$d_n \int_0^{1/d_n} U_{k/n}^a(1/u) du = \text{CTM}_{k/n}(a, 1/d_n)$$

concludes the proof. ■
